# Supplementary material
Source: Springer Nature journal article supplement (https://www.springermedizin.de/resource/supplementary/12916_2012_781_MOESM7_ESM.pdf/9598304)
Supplement: MOESM7 [file 9598304]

A

Rapamycin

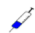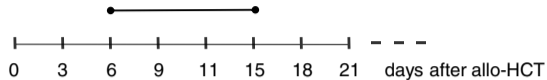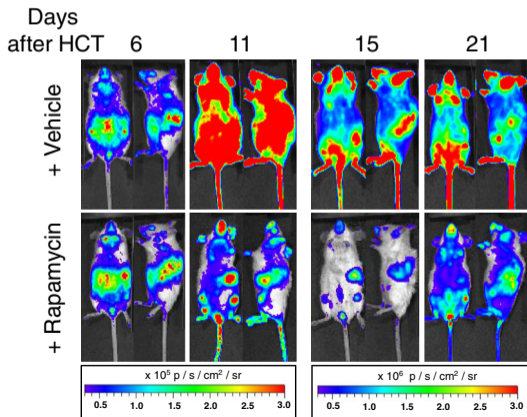

B

Total Body Signal

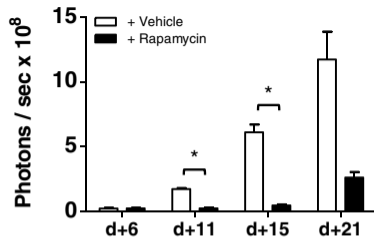

C

Clinical scoring

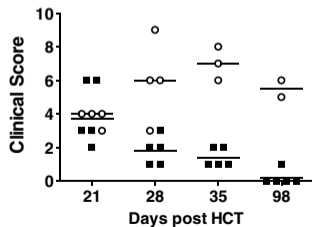

○ + Vehicle

■ + Rapamycin

Survival

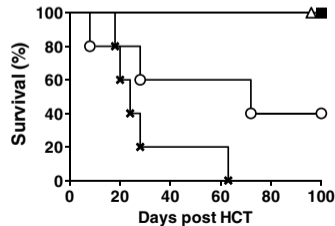

△ BM Ctrl

✱ Irradiation Ctrl
